# Supplementary material
Source: MDPI journal article supplement (https://www.mdpi.com/2071-1050/11/22/6399)
Supplement: s1 [file s1]

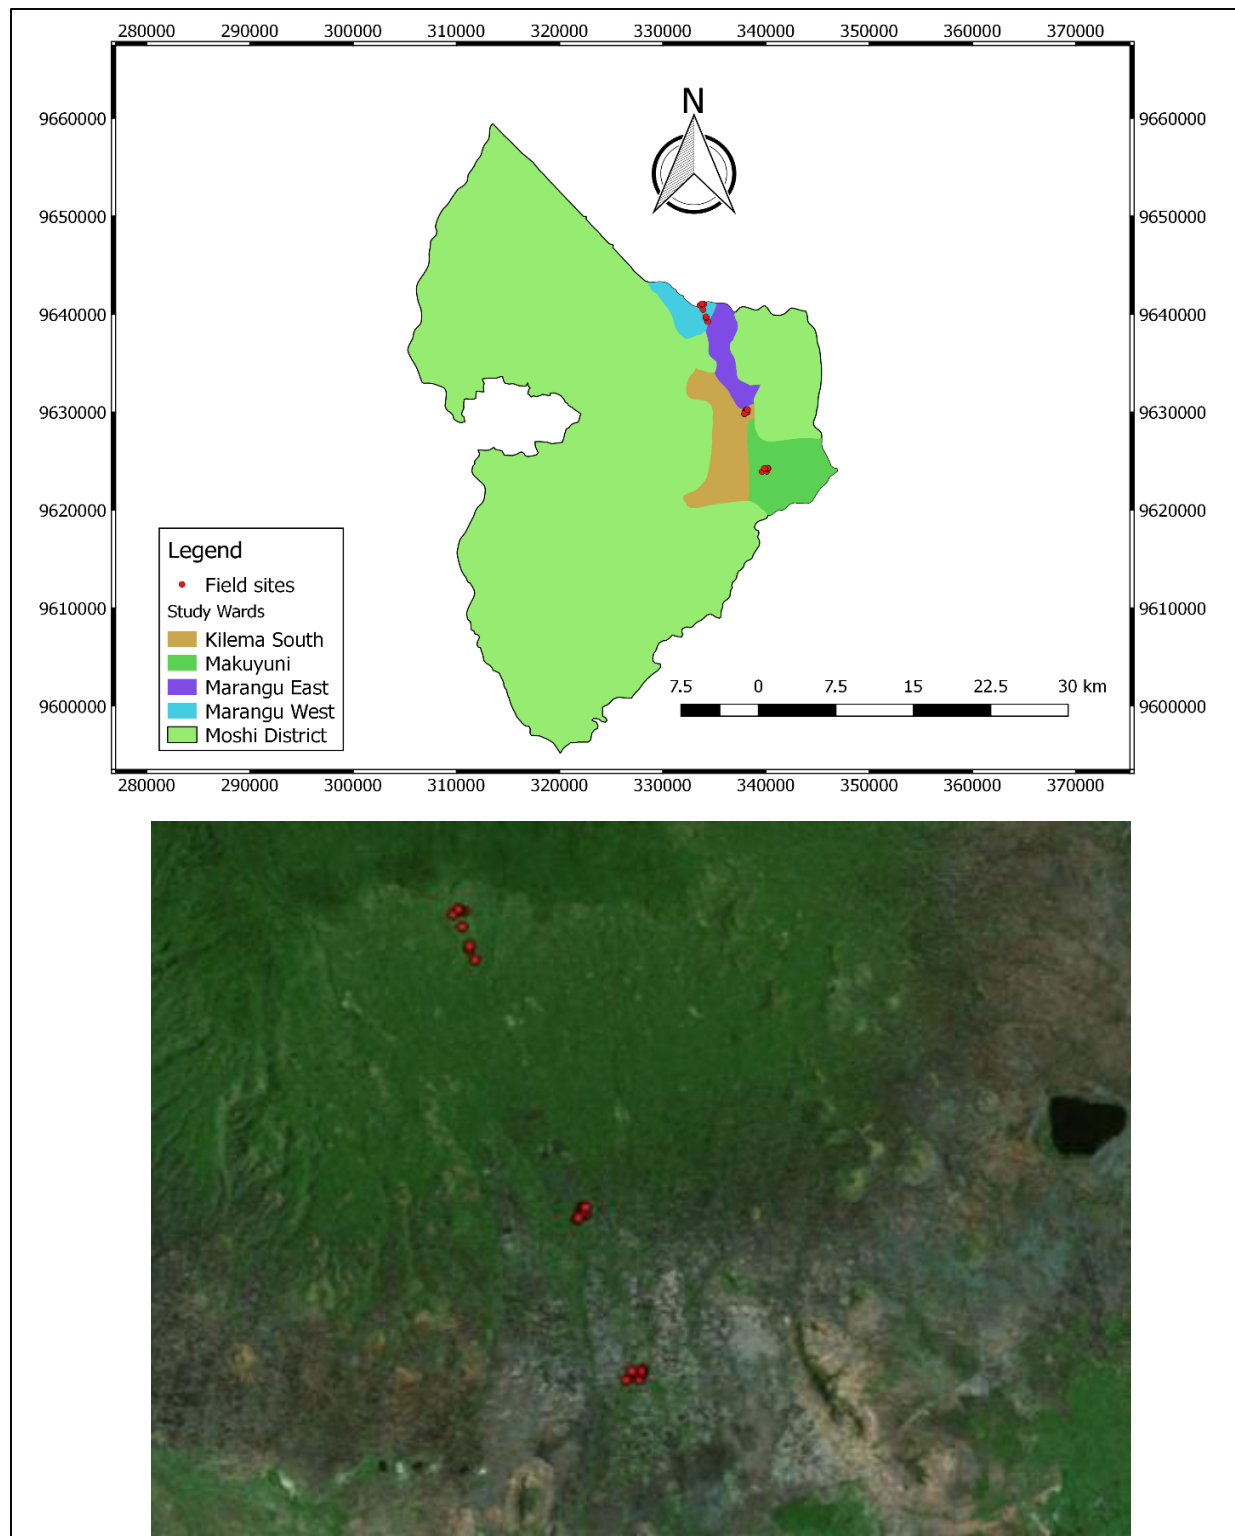

Supplementary figure S1: A map of Moshi rural district showing the study sites located in three elevation zones in northern Tanzania
